# Supplementary material
Source: PubMed Central journal article supplement (PMC3090241)
Supplement: supp_M013144_jlr.M013144-1.pdf [file supp_M013144_jlr.M013144-1.pdf]

Supplemental Figures

**The Intestine Maybe a Major Site of Action for the ApoA-I Mimetic Peptide 4F  
Whether the Peptide is Administered Subcutaneously or Orally**

Mohamad Navab<sup>1,2</sup>, Srinivasa T. Reddy<sup>2</sup>, G.M. Anantharamaiah<sup>3</sup>, Satoshi Imaizumi<sup>2</sup>,  
Greg Hough<sup>2</sup>, Susan Hama<sup>2</sup>, Alan M. Fogelman<sup>2</sup>

<sup>2</sup>Department of Medicine David Geffen School of Medicine at UCLA, Los Angeles, CA 90095

<sup>3</sup> Department of Medicine University of Alabama at Birmingham, AL 35294

**Abbreviated Title:** *4F may act in the intestine regardless of route of administration*

<sup>1</sup>**Corresponding Author:** Mohamad Navab, Ph.D.  
Room A2-237 CHS  
Division of Cardiology  
Department of Medicine  
David Geffen School of Medicine at UCLA  
10833 Le Conte Avenue  
Los Angeles, CA 90095-1679  
Telephone number: 310-206-2678  
Fax number: 310-206-9133  
E-mail: [mnavab@mednet.ucla.edu](mailto:mnavab@mednet.ucla.edu)

**Supplementary key words:** atherosclerosis ● apolipoprotein A-I ● apolipoprotein A-I mimetic peptides ● lipoproteins ● HDL

**Abbreviations:** CHD, coronary heart disease; C<sub>max</sub>, maximal concentration; HII, HDL-inflammatory index; IV, intravenous; SAA, Serum amyloid A; SQ, subcutaneous; 4F (Ac-D-W-F-K-A-F-Y-D-K-V-A-E-K-F-K-E-A-F-NH<sub>2</sub>); D-4F, 4F synthesized from all D-amino acids; L-4F, 4F synthesized from all L-amino acids; Sc-D-4F, (Ac-D-W-F-A-K-D-Y-F-K-K-A-F-V-E-E-F-A-K-NH<sub>2</sub>) a control scrambled peptide containing the same D-amino acids as in D-4F but in a sequence that does not promote  $\alpha$ -helical formation; LPA, lysophosphatidic acid.

**Supplemental Figure 1.**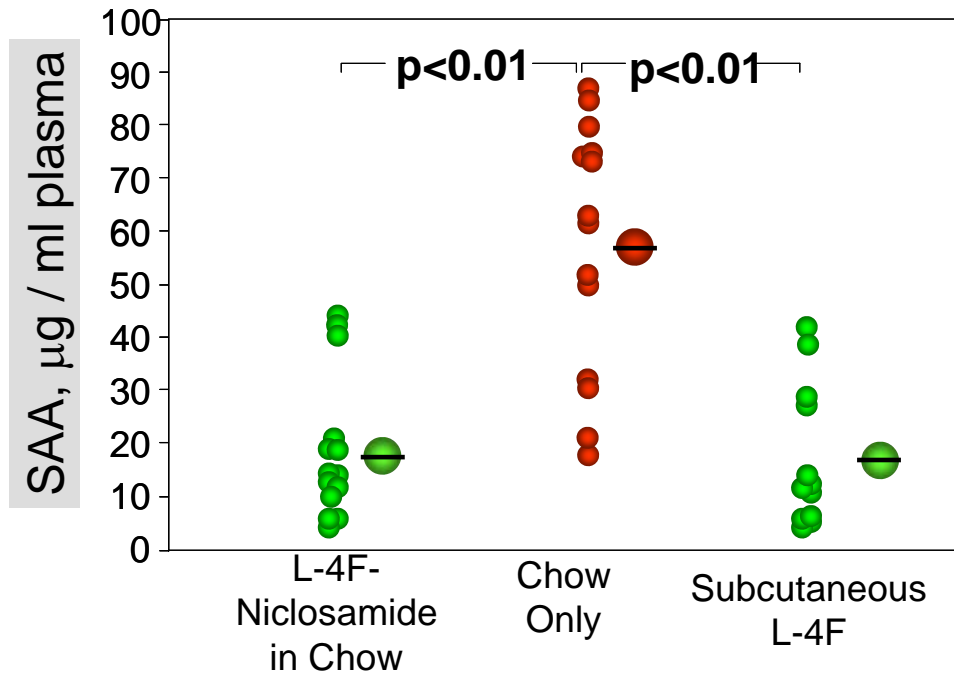

**Supplemental Figure 1.** SAA levels were reduced similarly in mice administered L-4F with niclosamide orally compared to the same dose of L-4F administered by subcutaneous (SQ) injection without niclosamide. Female apoE null mice (n = 12 -14 per group) age 16 – 18 months were administered mouse chow with or without L-4F (200 µg/mouse/day; 10 mg/kg/day) with niclosamide 2,000 µg/mouse/day or were administered L-4F by SQ injection at a dose of 10 mg/kg/day without niclosamide. After one week the mice were bled and serum amyloid A (SAA) levels were determined by ELISA as described in Methods.

**Supplemental Figure 2.**

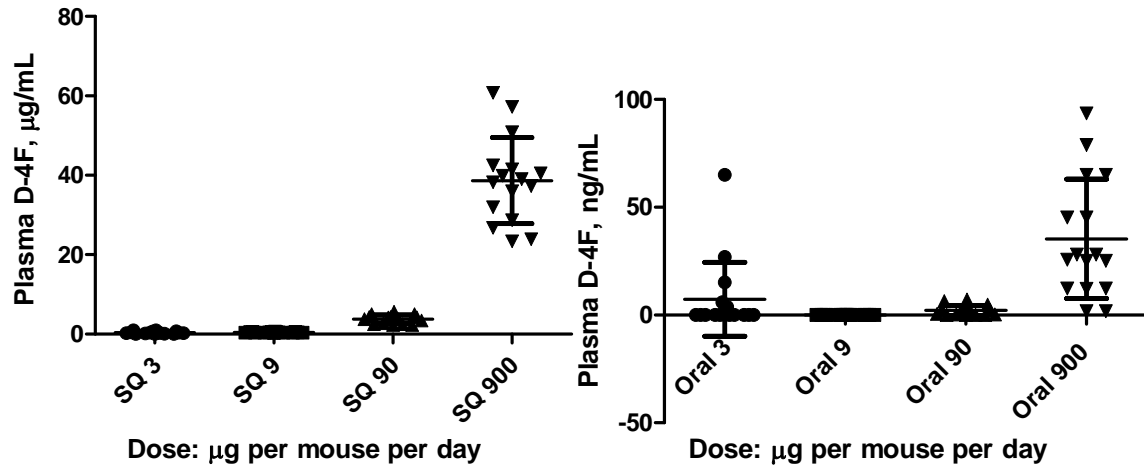

**Supplemental Figure 2.** The plasma D-4F levels of the mice described in Figure 4 and Table 2 are shown by the symbols which represent individual values for each mouse that received D-4F; the longer horizontal line represents the Mean and the shorter horizontal lines define one SD above and below the Mean.

**Supplemental Figure 3.**

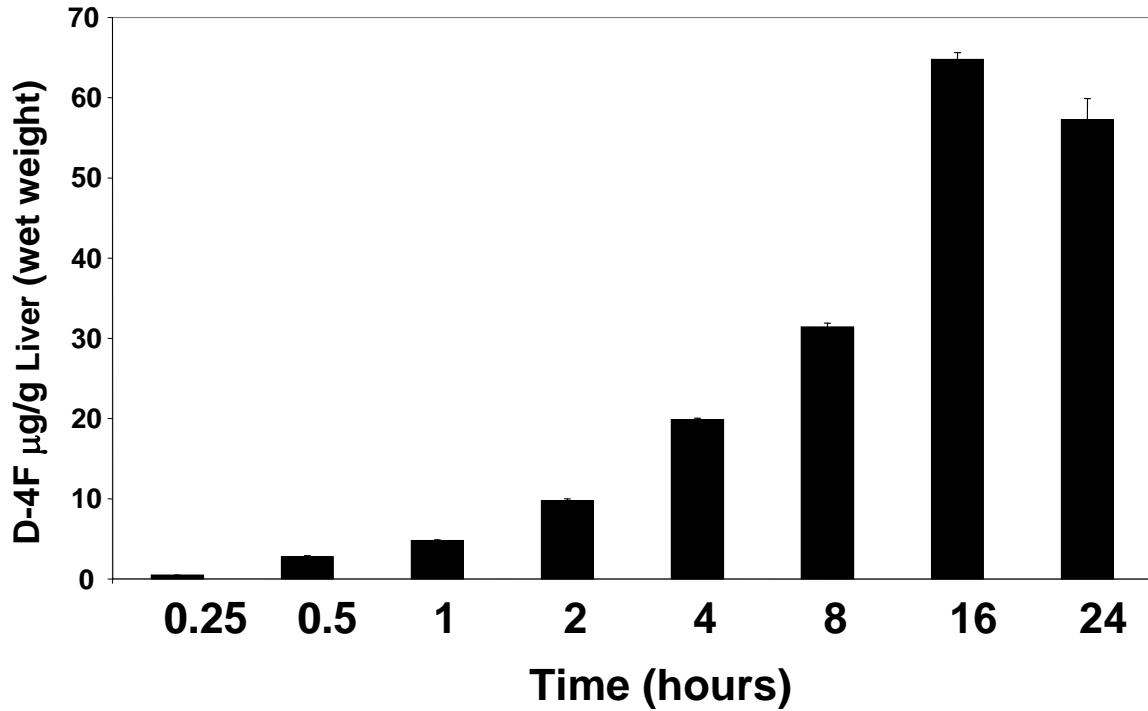

**Supplemental Figure 3.** Time course for hepatic D-4F levels after SQ administration. Eight female apoE null mice 6 – 7 months of age were fed a Western diet for two weeks and were administered 900 µg of D-4F SQ. The liver from one mouse at each time point was purged of blood and harvested and hepatic D-4F levels were determined as described in Methods. The values shown are the Mean ± SD of three samples from the liver of each mouse.

Supplemental Figure 4A.

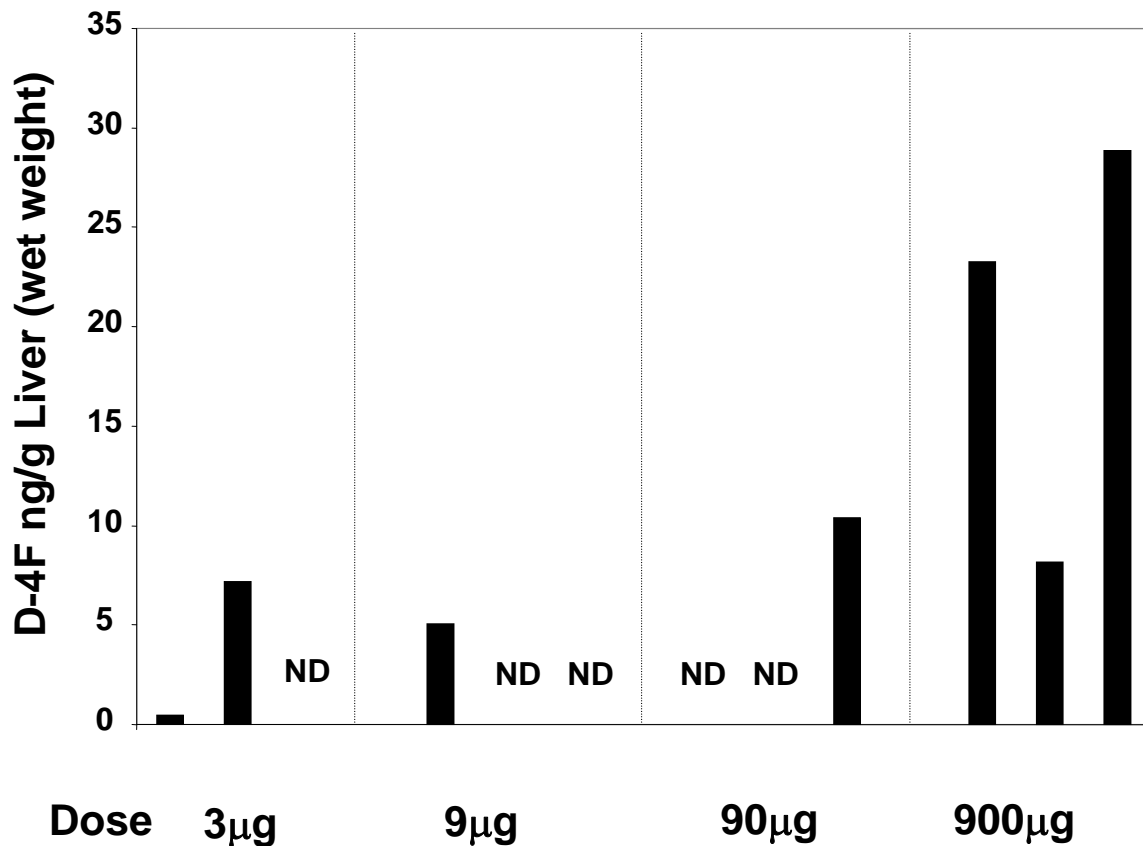

**Supplemental Figure 4A.** Dose response for hepatic D-4F levels after oral administration. Twelve female apoE null mice 6 – 7 months of age were fed a Western diet for two weeks. The mice were administered the dose of D-4F in their drinking water shown on the X-axis. Sixteen hours after the peptide was consumed, the livers from 3 mice at each time point were purged of blood, harvested and hepatic D-4F levels were determined as described in Methods. The values shown are the individual values for each of the 3 mice at each dose. ND = not detected (i.e. the values were below the level of quantification of the assay).

**Supplemental Figure 4B.**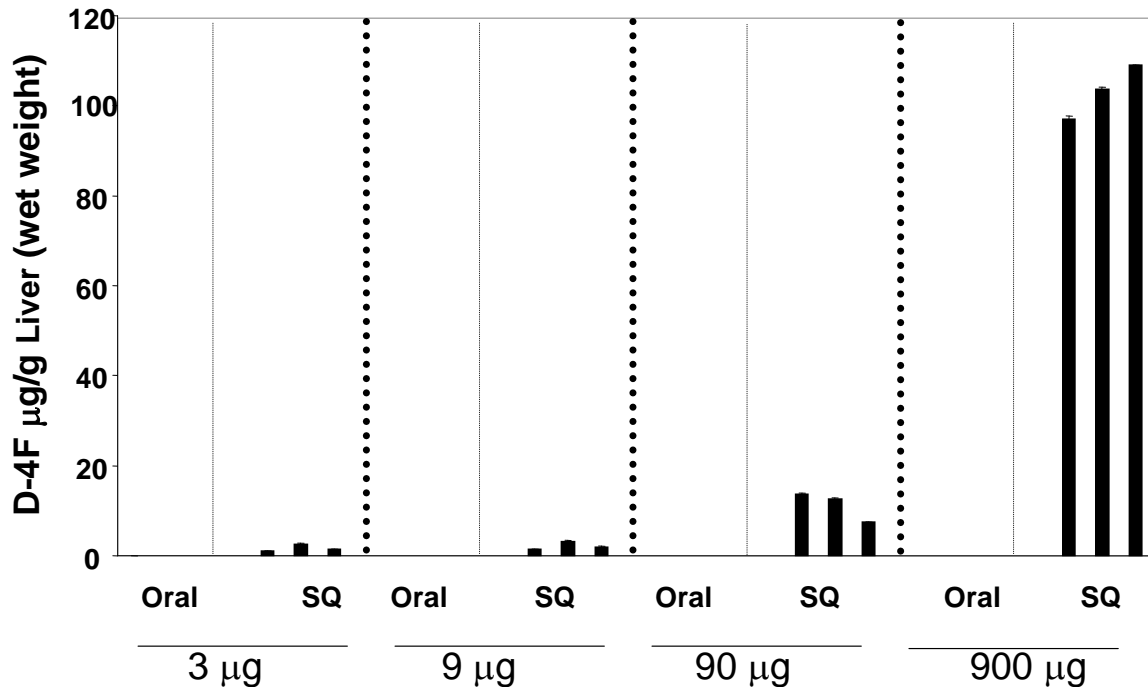

**Supplemental Figure 4B.** Dose response for hepatic D-4F levels after SQ or oral administration. Female apoE null mice 6 – 7 months of age were fed a Western diet for 2 weeks and were administered the dose of D-4F SQ as shown on the X-axis. Sixteen hours after the administration of the peptide, the livers from 3 mice at each SQ dose were purged of blood, harvested, and hepatic D-4F levels were determined as described in Methods. The values shown are Mean  $\pm$  SD for each mouse at each SQ dose determined in triplicate samples. The mean values for the 3 mice in each dose group in Figure 4A were also calculated and plotted (Oral). Since the hepatic D-4F levels in all of the mice in Figure 4A were less than 1  $\mu\text{g/g}$  liver, these values are not visible in the graph.
